# Supplementary material for: Comprehensive In Vitro Toxicity Testing of a Panel of Representative Oxide Nanomaterials: First Steps towards an Intelligent Testing Strategy
Source: PubMed Central journal article supplement (PMC4440714; doi:10.1371/journal.pone.0127174), 2015-05-21
Supplement: pone.0127174.s001.pdf [file pone.0127174.s001.pdf]

## Supporting Information – S1 File

Table A. Physico-chemical parameters of representative oxide NMs (TiO<sub>2</sub>, ZnO and SiO<sub>2</sub>) used for the *in vitro* studies [21-23]

| TiO <sub>2</sub> | Composition (wt%)                                             | Surface chemistry                                                                                                                                                                               | Crystal phase                                    | Crystalline size (nm) | Primary Particle size (nm) | Particle size distribution Number (expressed in %)    | Aggregates/agglomerates size (nm)                                                                         | Specific surface area (m <sup>2</sup> /g) | Zeta potential and IEP (surface charge)                                             | Solubility                                                                                  | TEM images                                                                           |
|------------------|---------------------------------------------------------------|-------------------------------------------------------------------------------------------------------------------------------------------------------------------------------------------------|--------------------------------------------------|-----------------------|----------------------------|-------------------------------------------------------|-----------------------------------------------------------------------------------------------------------|-------------------------------------------|-------------------------------------------------------------------------------------|---------------------------------------------------------------------------------------------|--------------------------------------------------------------------------------------|
| <b>NM-103</b>    | Ti 54.74<br>O 40.82<br>Al 3.43<br>Si 0.68<br>Fe 0.06<br>(EDS) | 2% mass loss (TGA).<br>dimethoxydimethylsilane, silanes (2 wt%) (GC-MS);<br>O: 56, C: 25.9, Ti: 10.7, Al: 4.9, (Fe, Ca: 2.5); at % (XPS)                                                        | Rutile (XRD)                                     | 19→28 (XRD)           | 24.7±2.3 (TEM)             | <100 nm: 51.8%,<br><50 nm: 12.7 %, <10 nm: 0.1% (TEM) | 140, fractal dimension<br>Df: 2.2 (SAXS)<br>Morphology: Low sphericity, very angular to sub-angular (TEM) | 51 (BET),<br>51.1 (SAXS)                  | DI water + buffer:<br>at pH< 4 30 mV;<br>at pH > 8.2 -40mV;<br>IEP: 8.2 (Zetametry) | Al, Si detected in 0.05% BSA+water, DMEM, Gamble's solution; NM-103 only in DMEM (24 h SDR) | 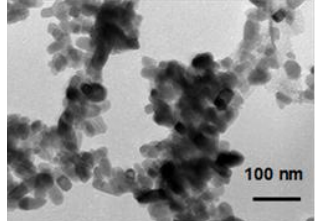  |
| <b>NM-104</b>    | Ti 55.60<br>O 59.81<br>Al 3.22<br>Si 0.18<br>(EDS)            | 2% mass loss (TGA).<br>Tetramethyl silicate, Glycerol; Silane; Hexadecanoic acid methyl ester; Hexadecanoic acid; Octadecanoic acid (GC-MS);<br>O: 63.5, C: 16.3, Ti: 13.1, Al: 7.1; at % (XPS) | Rutile (XRD)<br>Phase transition at 323°C (DTA). | 18→29 (XRD)           | 25.0±1.7 (TEM)             | <100 nm: 53.3%, <50 nm: 12.1%, <10 nm: 0.1% (TEM)     | 160, fractal dimension<br>Df: 2.3 (SAXS).<br>Morphology: Low sphericity, angular to sub-rounded (TEM)     | 56 (BET),<br>52.2 (SAXS)                  | DI water + buffer:<br>at pH< 4 30 mV;<br>at pH > 8.2 -40mV;<br>IEP: 8.2 (Zetametry) | Al detected in 0.05% BSA+water, DMEM, Gamble's solution; NM-104 only in DMEM (24h SDR)      |  |

| ZnO    | Composition (wt%)                                                                                 | Surface chemistry                                                                                                   | Crystal phase                     | Crystalline size (nm) | Primary Particle size (nm)                                                                                                                                                                                                                | Particle size distribution Number (expressed in %)                                                                                                                                                          | Aggregates/agglomerates size (nm)                                                                | Specific surface area (m <sup>2</sup> /g) | Zeta potential and IEP (surface charge)                                        | Solubility                                                         | TEM images                                                                           |
|--------|---------------------------------------------------------------------------------------------------|---------------------------------------------------------------------------------------------------------------------|-----------------------------------|-----------------------|-------------------------------------------------------------------------------------------------------------------------------------------------------------------------------------------------------------------------------------------|-------------------------------------------------------------------------------------------------------------------------------------------------------------------------------------------------------------|--------------------------------------------------------------------------------------------------|-------------------------------------------|--------------------------------------------------------------------------------|--------------------------------------------------------------------|--------------------------------------------------------------------------------------|
| NM-110 | Zn 89.90<br>Ni 0.0009<br>Pb 0.0008<br>Co 0.0003<br>Si 0.0195<br>Al 0.024<br>Ca 0.044<br>(ICP-OES) | No weight loss detected (TGA)<br><br>Uncoated.<br>C:69, Ce:0.0, O:25.1, Si:0.0, Zn:5.6; at % (XPS)                  | Hexagonal zincite structure (XRD) | 41.5 (XRD)            | Two main types of morphology:<br>1) 20-250 nm, aspect ratio ~1<br>2) 50-350 nm, aspect ratio 2 - 7.5.<br>Mean diameter ±SD: 158±158<br>Mean aspect ratio±SD: 1.7 ±0.6 (TEM)<br><br>151 ± 55.6 (Ferret's mean diameter ± 1 SD) (SEM)       | Relatively high number of small-size<br><br>Particles, peak-mode around 30 - 40 nm another major broad size mode ca. 200 nm.<br>Merged broad bimodal or clearly bi- or tri-modal in the μm-range (FMPS/APS) | 275±4 with PDI: 0.145 (in DI water) (DLS)<br><br>193±3 (in DI water), 309±10 (in seawater) (CPS) | 12.4±0.6 (BET)                            | In DI water: 24.3±0.4 mV<br><br>In DI water +5mM NaCl: 20.8±0.8 mV (Zetasizer) | 2.5 – 4 ppm in DI water after 6-21 days<br><br>(Colorimetric test) | 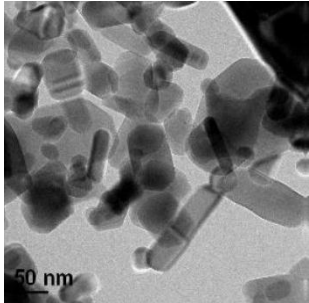  |
| NM-111 | Zn 87.39<br>Ni 0.0009<br>Pb 0.0008<br>Co 0.0003<br>Si 0.0265<br>Al 0.027<br>Ca 0.074<br>(ICP-OES) | 1% mass loss (TGA)<br><br>Coated with triethoxycapryl silane.<br>C:67.9, Ce:0.0, O:24.3, Si:3.5, Zn:4.3; at % (XPS) | Hexagonal zincite structure (XRD) | 33.8 (XRD)            | Two main types of morphology:<br>1) 20-200 nm, aspect ratio ~1<br><br>2) 10-450 nm, aspect ratio 2 - 8.5.<br>Mean diameter ±SD: 152±111<br>Mean aspect ratio±SD: 1.8 ±0.7 (TEM)<br><br>140.8 ± 65.8 (Ferret's mean diameter ± 1 SD) (SEM) | Relatively high number of small-size<br><br>Particles, peak-mode around 30 - 40 nm another major broad size mode ca. 200 nm.<br>Merged broad bimodal or clearly bi- or tri-modal in the μm-range (FMPS/APS) | 253±1 with PDI: 0.401 (in DI water) (DLS)                                                        | 15.1±0.6 (BET)                            | -                                                                              | -                                                                  |  |

| SiO <sub>2</sub> | Composition (wt%)                                                                           | Surface chemistry                                                                        | Crystal phase                                                                               | Crystalline size (nm) | Primary Particle size (nm) | Particle size distribution Number (expressed in %)     | Aggregates/agglomerates size (nm)                                                                                    | Specific surface area (m <sup>2</sup> /g) | Zeta potential and IEP (surface charge)                                                   | Solubility                                                                    | TEM images                                                                           |
|------------------|---------------------------------------------------------------------------------------------|------------------------------------------------------------------------------------------|---------------------------------------------------------------------------------------------|-----------------------|----------------------------|--------------------------------------------------------|----------------------------------------------------------------------------------------------------------------------|-------------------------------------------|-------------------------------------------------------------------------------------------|-------------------------------------------------------------------------------|--------------------------------------------------------------------------------------|
| NM-200           | Si 44.77<br>O 53.02<br>Al 0.46<br>Na 0.88<br>S 0.87, traces of Fe, K<br>Mg, Zr<br>(ICP-OES) | 4% mass loss (TGA)<br>O: 70.8,<br>Si: 24.1 ,<br>C:4.1 ,<br>Na:1 ,<br>S:0.06 ; at % (XPS) | Synthetic amorphous silica; crystalline impurities of Na <sub>2</sub> SO <sub>4</sub> (XRD) | amorphous             | 14 ± 7 (TEM)               | <100 nm - 88.7%, <50 nm - 69.8%<br><10 nm - 1.7% (TEM) | 440, fractal dimension Df: 2.45 (SAXS)<br>200 (DLS),<br>Morphology: Sub-rounded, low to medium sphericity (TEM)      | 189.16 (BET),<br>123.3 (SAXS)             | In DI water: -47.5 mV<br>IEP <2<br><br>In DI water +0.05 %<br>BSA: -18 mV<br>(Zetametry). | Al and NM-200 detected in 0.05% BSA+water, DMEM, Gamble's solution (24 h SDR) | 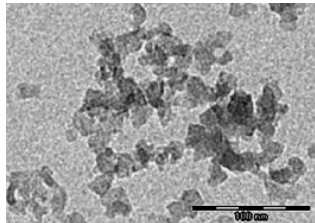  |
| NM-203           | Si 46.32<br>O 53.21<br>Al 0.43<br>S 0.04<br>(EDS)                                           | No mass loss (TGA)<br>O: 71.7,<br>Si: 26, C: 2.3; at% (XPS)                              | Synthetic amorphous silica (XRD)                                                            | amorphous             | 13± 6 (TEM)                | <100 nm - 77.5%, <50 nm - 48.4%<br><10 nm - 0.3% (TEM) | Aggregates with complex open structure.<br>Morphology: Low sphericity, angular. (TEM)<br>Polydisperse material (DLS) | 203.92 (BET),<br>167.2 (SAXS)             | In DI water: -46.1 mV<br>IEP <2<br><br>In DI water +0.05 %<br>BSA: -18 mV<br>(Zetametry)  | Al and NM-203 detected in 0.05% BSA+water, DMEM, Gamble's solution (24 h SDR) |  |

**Abbreviations:** CPS – Centrifugal Particle Sedimentation, DLS - Dynamic Light Scattering, DTA - Differential Thermal Analysis, EDS - Energy-Dispersive X-ray Spectroscopy, GC-MS - Gas Chromatography–Mass Spectrometry, ICP-OES - Inductively Coupled Plasma Optical Emission Spectrometry, IEP - Iso-Electric Point, SAXS - Small Angle X-ray Scattering, SEM - Scanning Electron Microscopy, SDR - Sensor Disk Reader, SiO<sub>2</sub> - silicon dioxide, TGA - thermogravimetric analysis, TiO<sub>2</sub> – titanium dioxide, TEM - Transmission Electron Microscopy, ZnO – zinc oxide, XRD - X-ray Diffraction.
