# Supplementary material for: Comprehensive In Vitro Toxicity Testing of a Panel of Representative Oxide Nanomaterials: First Steps towards an Intelligent Testing Strategy
Source: PubMed Central journal article supplement (PMC4440714; doi:10.1371/journal.pone.0127174), 2015-05-21
Supplement: pone.0127174.s003.pdf [file pone.0127174.s003.pdf]

## Supporting Information – S3 File

### Evaluation of oxide nanomaterials interferences with LDH, ELISA, Resazurin, NRU and WST-8 and WST-1 assays

#### TiO<sub>2</sub> NMs

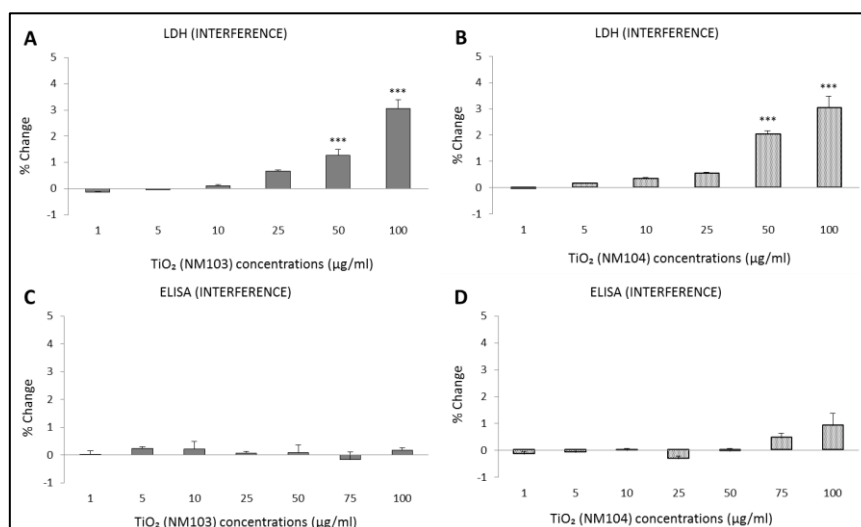

**Fig. O. Interference of Titanium dioxide nanomaterials (NM-103 and NM-104) with LDH assay (A and B) and ELISA (C and D)**

A significant interference with the LDH assay in a dose-dependent manner was observed. However at the doses used in our studies the maximum percent change induced by both nanomaterials was around 3%. Values of interference with the ELISA were always below 1%.

For WST-1 assay (*data not shown*), both NM-103 and NM-104, control experiment wells containing NMs and cells only were shown to have minimal absorbance readings, thus it was concluded that there was no interference from TiO<sub>2</sub> on the assay.

For WST-8 assay the interferences with TiO<sub>2</sub> used for the cytotoxicity testing shown in Figures S6-S8 in File S3 were performed as described previously (*Kroll et al. 2012*). The used concentrations were below the observed interfering concentrations.

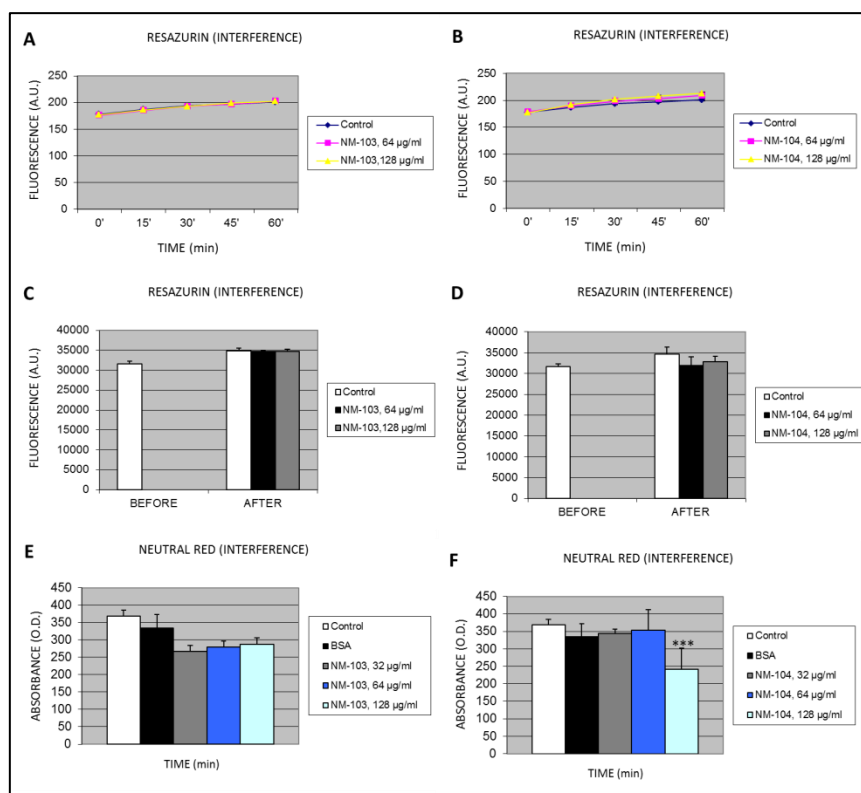

**Fig. P. Interferences of TiO<sub>2</sub> (NM-103 and NM-104) with resazurin and NRU assays**

The fluorescence read at the 60 min time point in the absence of cells was not significantly influenced by TiO<sub>2</sub> NMs and < 0.5% of the minimal value obtained in the presence of cells. It is concluded that TiO<sub>2</sub> NMs do not interfere with the resazurin method through autofluorescence (A and B). The supplementation of medium with TiO<sub>2</sub> NMs did not appreciably quench resazurin-derived fluorescence (C and D). For the NRU assay (E and F), the results indicate that addition of neutral red solution with TiO<sub>2</sub> (NM-103 or NM-104). NMs decrease OD values and showing a binding of neutral red to the NMs. However, binding is not dose dependent, suggesting that only a fraction of the dye solution (which is not homogeneous) is adsorbed to the NMs. Neutral Red binding to TiO<sub>2</sub> NMs should remove the dye to the solution and, hence, lower its uptake by the cells, factitiously lowering viability signal. Alternatively, given that NMs enter cells, dye binding could increase its accumulation in the cells and, hence, increase viability signal. Actually, results of neutral red assay indicate smaller viability decreases compared with the resazurin assay. Data are means  $\pm$  SD of 6 independent determinations in two separate experiments. Statistical analysis was performed using one-way ANOVA followed by Bonferroni post-hoc test. \* $p < 0.05$ , \*\*\* $p < 0.001$ .

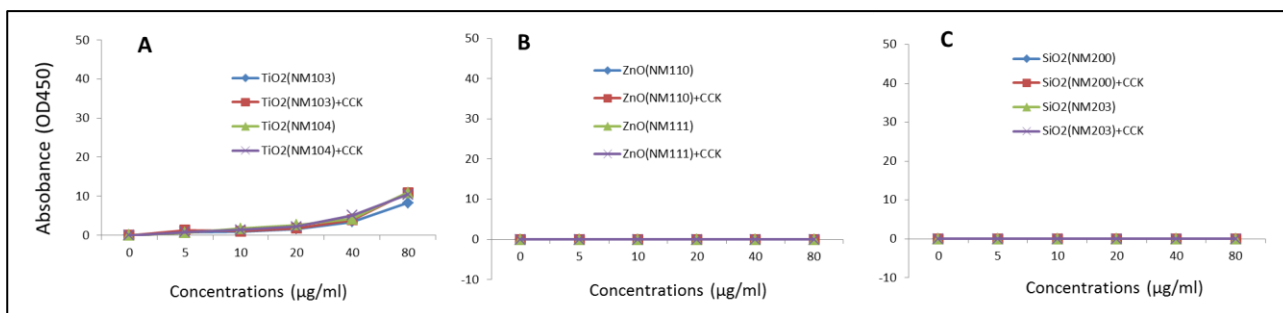

**Fig. Q. Interferences the six NMs tested with the WST-8 (CCK) assay. Interferences with the assay readouts were observed in the case of both TiO<sub>2</sub> NMs (A) but not for ZnO and SiO<sub>2</sub> (B and C)**

In the estimation of interference of WST-8 (CCK) assay, NMs were directly added to the test system without cells. The absorbance of OD450 was measured with or without CCK solution stain. The difference between the regular test procedures to this no-cell WST-8 test assay was that most NMs in the incubation medium being washed away before CCK solution added in the regular ones. There was only about 10 percent of the cell viability over-estimation at 80 µg/ml TiO<sub>2</sub> treatment condition in no-cell test, and even much lower at other lower exposure concentrations. Therefore, the actual test interference of those residue NMs was quite low and not likely to influence the results significantly.

## ZnO NMs

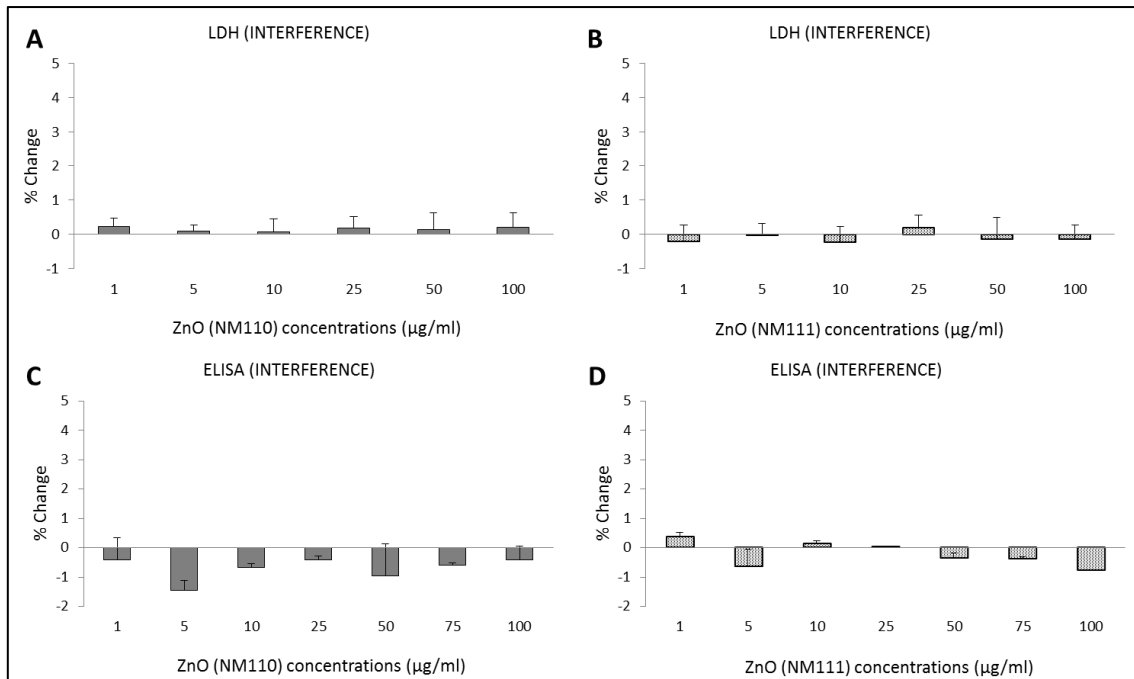

**Fig. R. Interference of Zinc oxide nanomaterials (NM-110 and NM-111) with LDH assay (A and B) and ELISA (C and D)**

The results showed that NM-110 and NM-111 do not interfere with the LDH assay as the values of interference were always below 0.25%. The evaluation of NMs-assay interferences showed that none of the ZnO NMs interferes with the ELISA assay.

For the WST-1 assay (*data not shown*), both NM-110 and NM-111 shown to have minimal absorbance readings, thus it was concluded that there was no interference from ZnO in this assay.

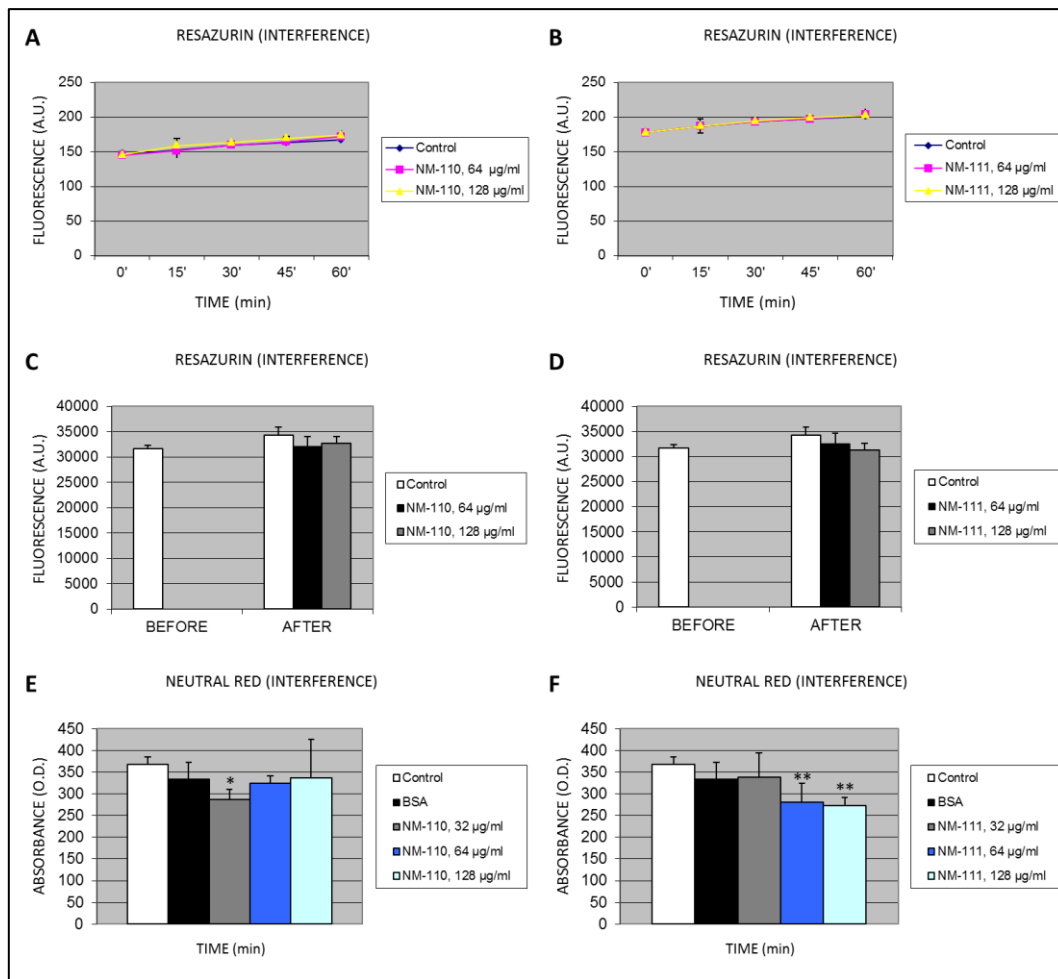

**Fig. S. Interferences of ZnO (NM-110 and NM-111) with resazurin and NRU**

The fluorescence read at the 60 min time point in the absence of cells was not significantly influenced by ZnO NMs and < 0.5% of the minimal value obtained in the presence of cells. It is concluded that ZnO NMs do not interfere with the resazurin method through autofluorescence (A and B). The supplementation of medium with ZnO NMs did not appreciably quench resazurin-derived fluorescence (C and D). For the NRU assay (E and F), the results indicate that addition of neutral red solution with ZnO (NM-110 or NM-111). NMs decrease OD values and showing a binding of neutral red to the NMs. However, binding is not dose dependent, suggesting that only a fraction of the dye solution (which is not homogeneous) is adsorbed to the NMs. Neutral Red binding to ZnO NMs apparently decreases the free dye concentration in the solution and, hence, lowers its uptake by the cells, factitiously lowering viability signal. Alternatively, given that NMs enter cells, dye binding could increase its accumulation in the cells and, hence, increase viability

signal. Actually, results of neutral red assay indicate smaller viability decreases compared with the resazurin assay. Data are means  $\pm$  SD of 10 independent determinations in two separate experiments. Statistical analysis was performed using one-way ANOVA followed by Bonferroni post-hoc test. \* $p < 0.05$ , \*\* $p < 0.01$ .

## SiO<sub>2</sub> NMs

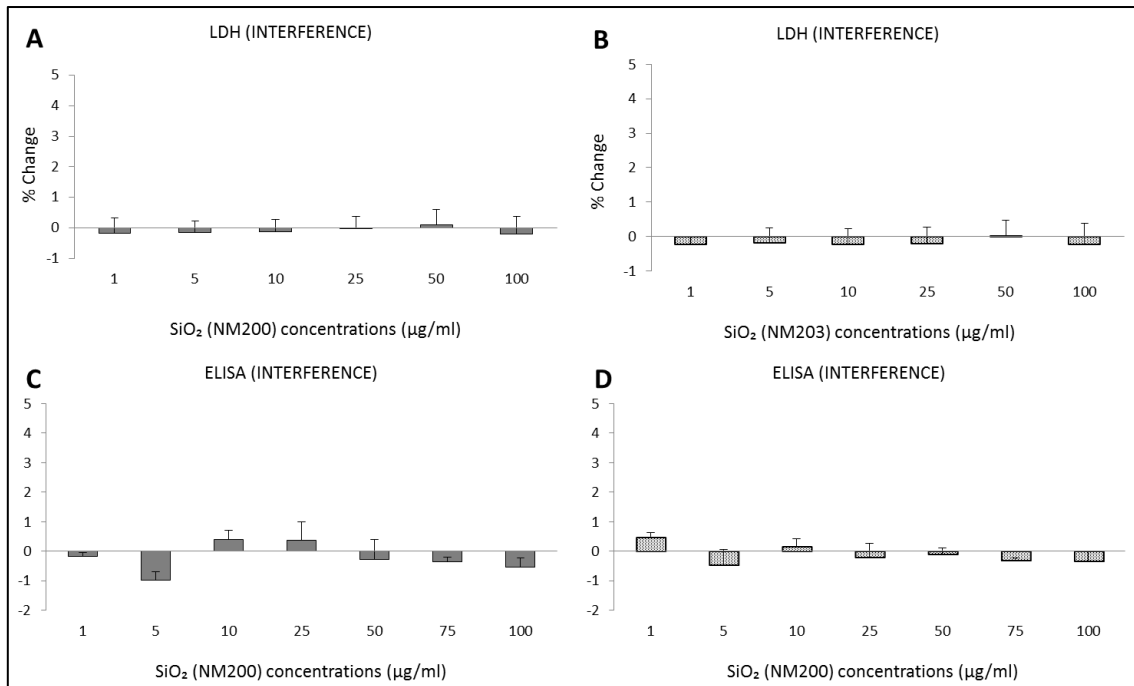

**Fig. T. Interference evaluation of SiO<sub>2</sub> (NM-200 and NM-203) with LDH assay (A and B) and ELISA (C and D)**

The results showed that both NMs (NM-200 and NM-203) do not interfere with the LDH assay as the values of interference were always below 0,25%. Also none of the SiO<sub>2</sub> NMs interferes with the ELISA.

WST-1 assay (*data not shown*) - for both NM-200 and NM-203, control wells containing NM and wells containing cells only were shown to have minimal absorbance readings, thus it was concluded that there was no interference from the SiO<sub>2</sub>.

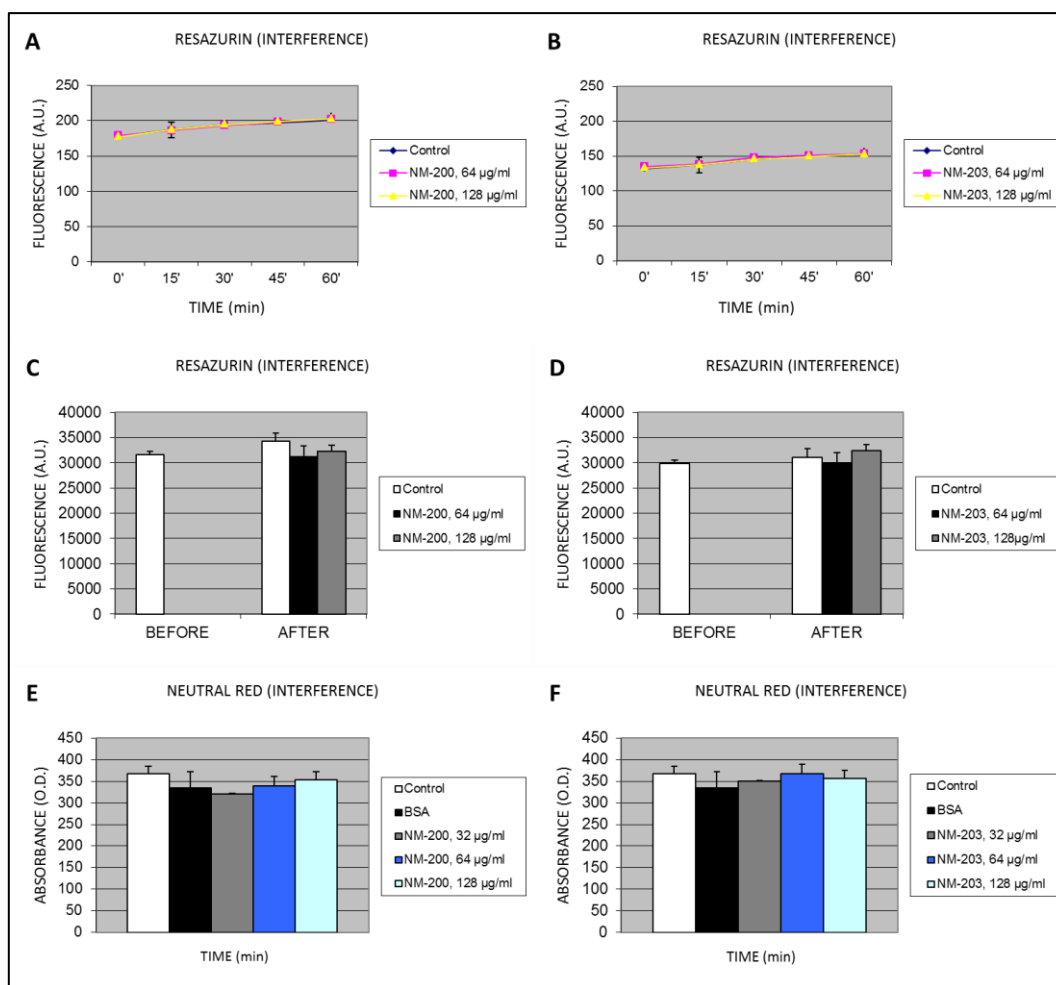

**Fig. U. Interferences of SiO<sub>2</sub> NMs with resazurin (A-D) and NRU (E-F) assays**

The fluorescence read at the 60 min time point was not significantly influenced by SiO<sub>2</sub> NMs and < 0.5% of the minimal value obtained in the presence of cells. It is concluded that SiO<sub>2</sub> NMs do not interfere with the resazurin method through autofluorescence (A and B) while the addition of SiO<sub>2</sub> NMs in culture medium did not appreciably quench resazurin-derived fluorescence (C and D).

Regarding the assay-NMs interferences with NRU assay (E and F), the results indicate that the supplementation of neutral red solution with SiO<sub>2</sub> NMs did not influence the OD values, indicating the absence of significant dye binding. Data are means ± SD of 10 independent determinations in two separate experiments. Statistical analysis was performed using one-way ANOVA followed by Bonferroni post-hoc test.
